# Supplementary material for: Tough and Fatigue-Resistant Hydrogels with Triple Interpenetrating Networks
Source: Hindawi journal article supplement (doi:10.1155/2019/6923701), 2019-02-25
Supplement: f1 [file 6923701.f1.docx]

**Support Information**

**Tough and Fatigue Resistant Hydrogels with Triple Interpenetrating Networks**

Jilong Wang a,b, Junhua Wei b, Siheng Su b, and Jingjing Qiu b,*

*a College of Textiles, Donghua University, Shanghai 201620, China*

*b Department of Mechanical Engineering, Texas Tech University, 2500 Broadway, P.O. Box 43061, Lubbock, TX 79409, United States*

** E-mail:* [*jenny.qiu@ttu.edu*](mailto:jenny.qiu@ttu.edu)*; Phone: 806.742.3563; Fax: 506.742.3540*

**
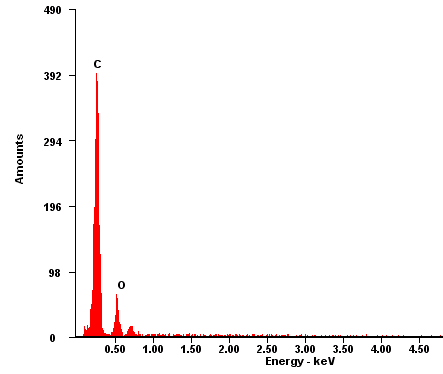
**

Figure S1. EDAX spectrum of graphene oxide


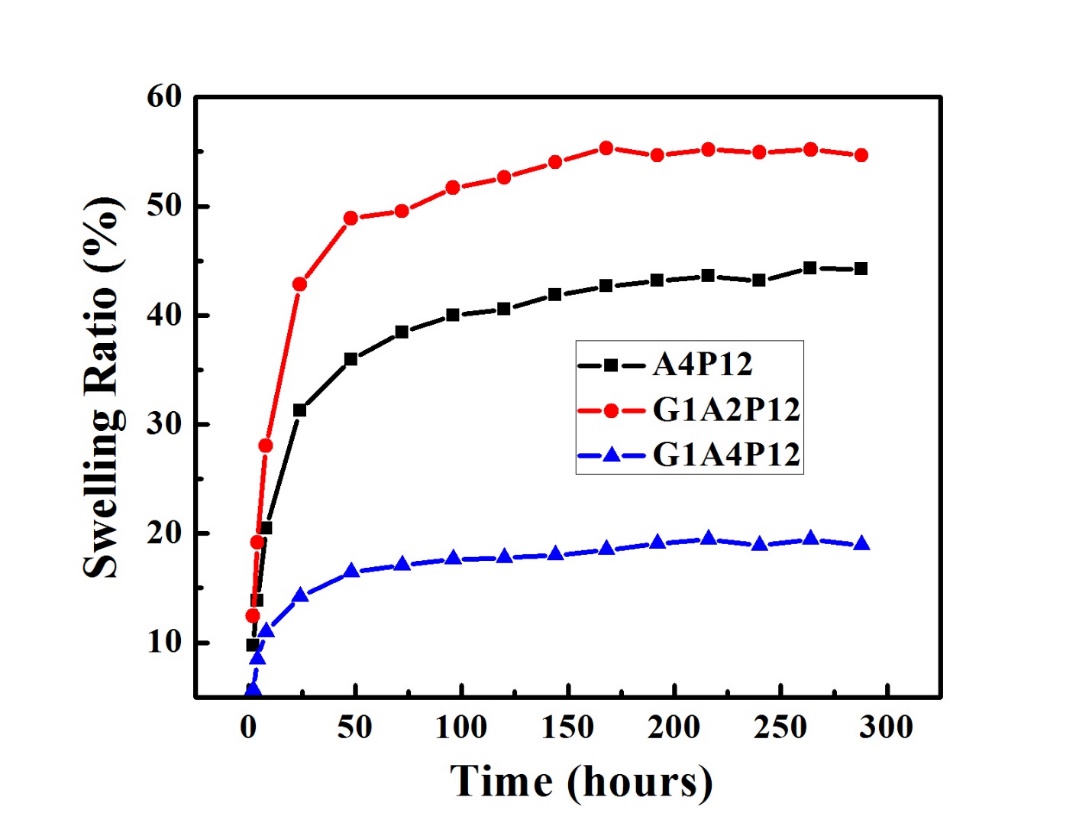


Figure S2. Swelling ratio of A4P12, G1A2P12, and G1A4P12


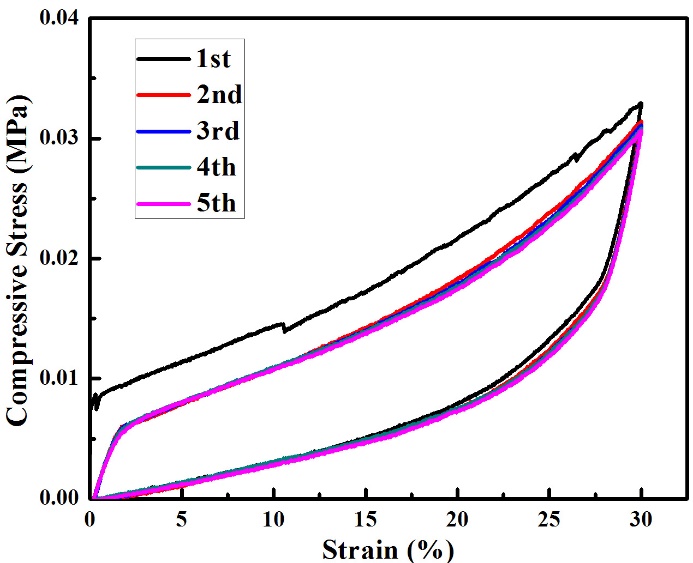

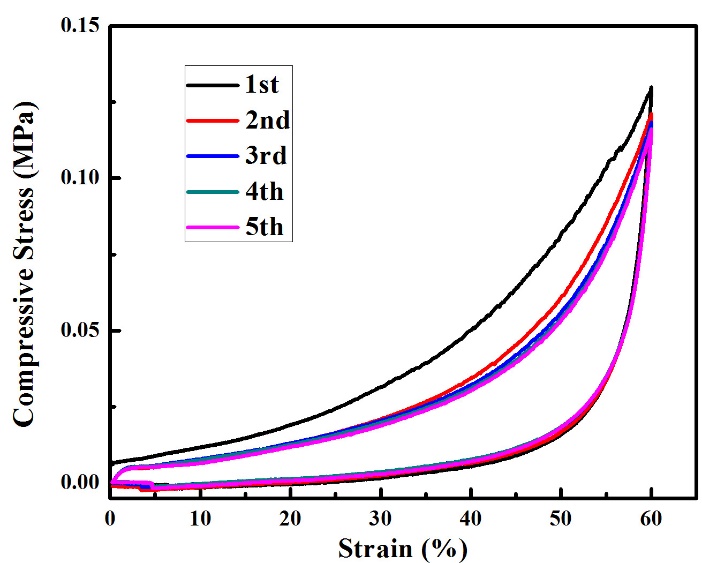


**(a)**

**(b)**


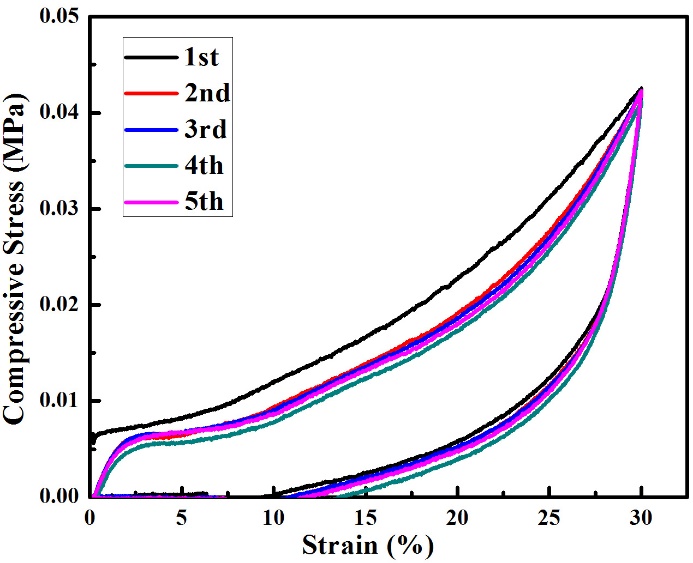

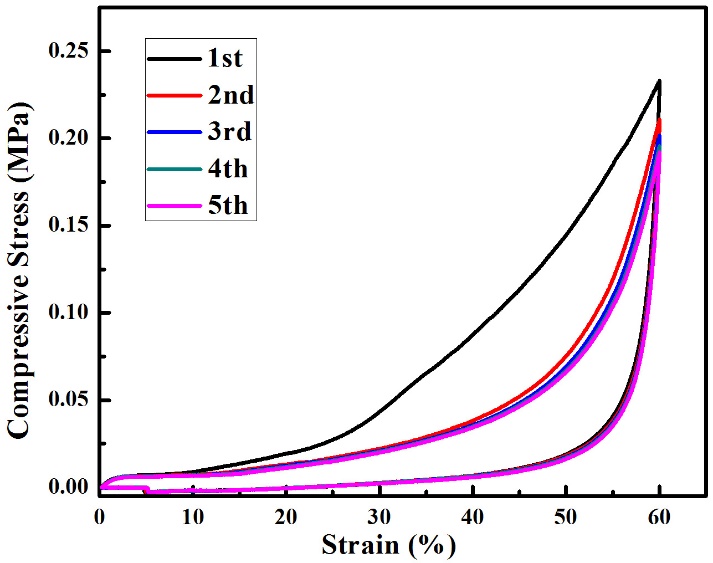


**(c)**

**(d)**

Figure S3. Representative cyclic loading−unloading curves of A2P12 hydrogels at (a) 30% and (b) 60% strain for up to five cycles, and representative cyclic loading−unloading curves of G1A2P12 hydrogels at (c) 30% and (d) 60% strain for up to five cycles.


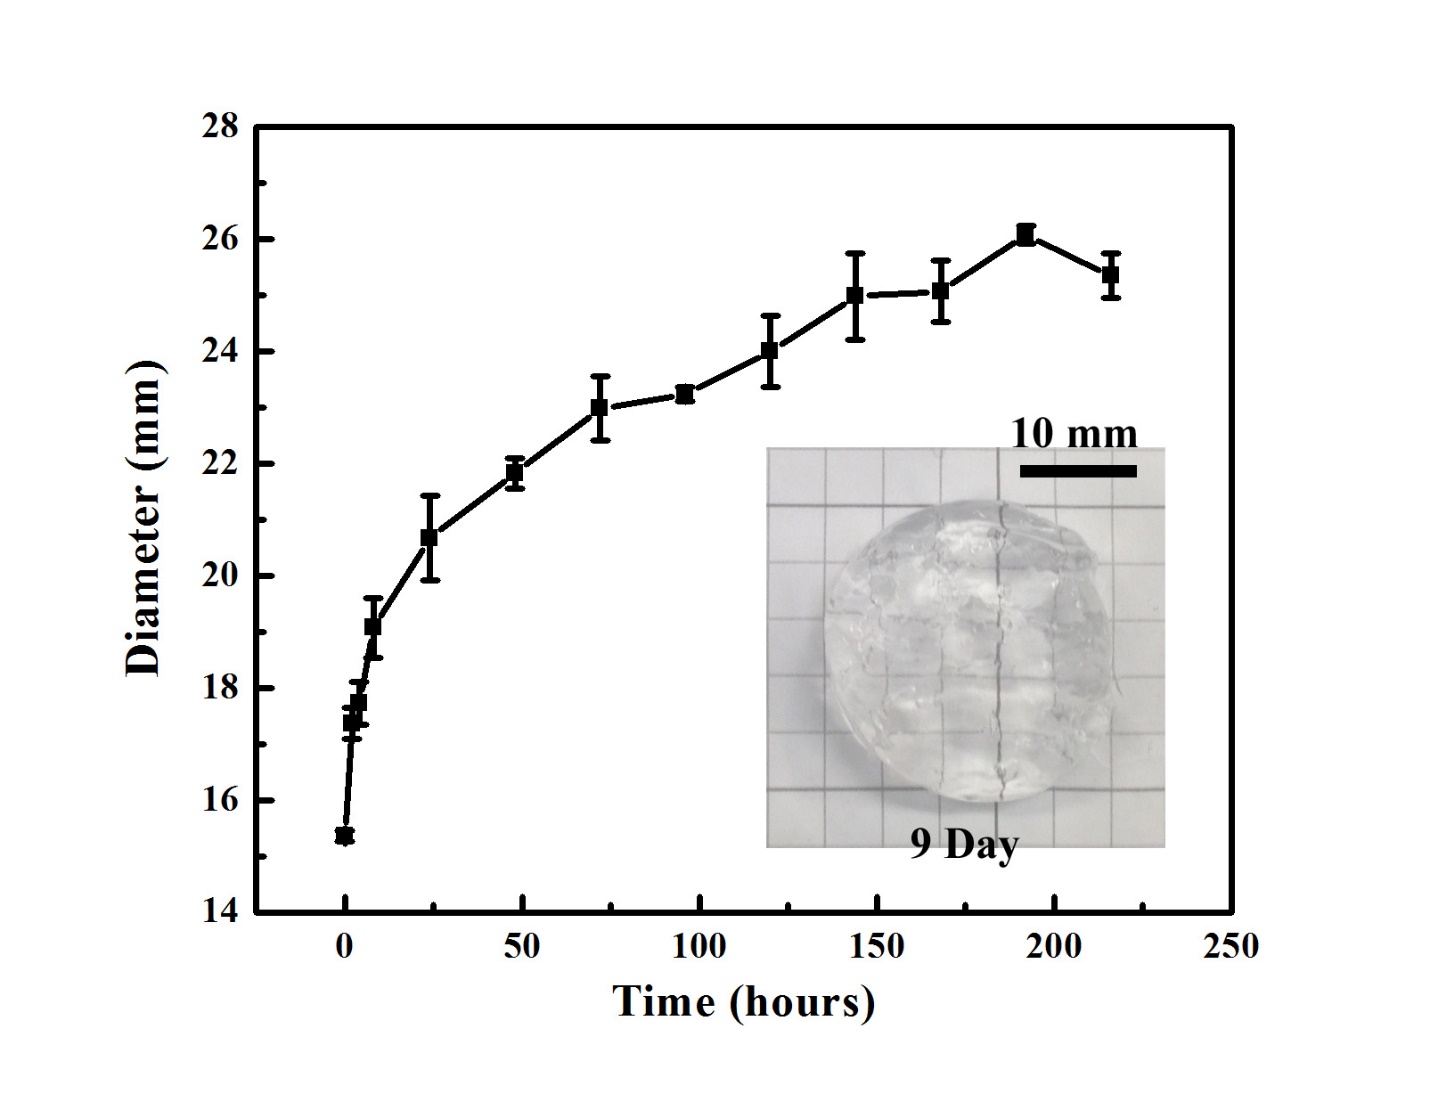


Figure S4. Size change of P12 single network hydrogel and insert is the shape of P12 SN hydrogel after 9-day soaking in DI water.


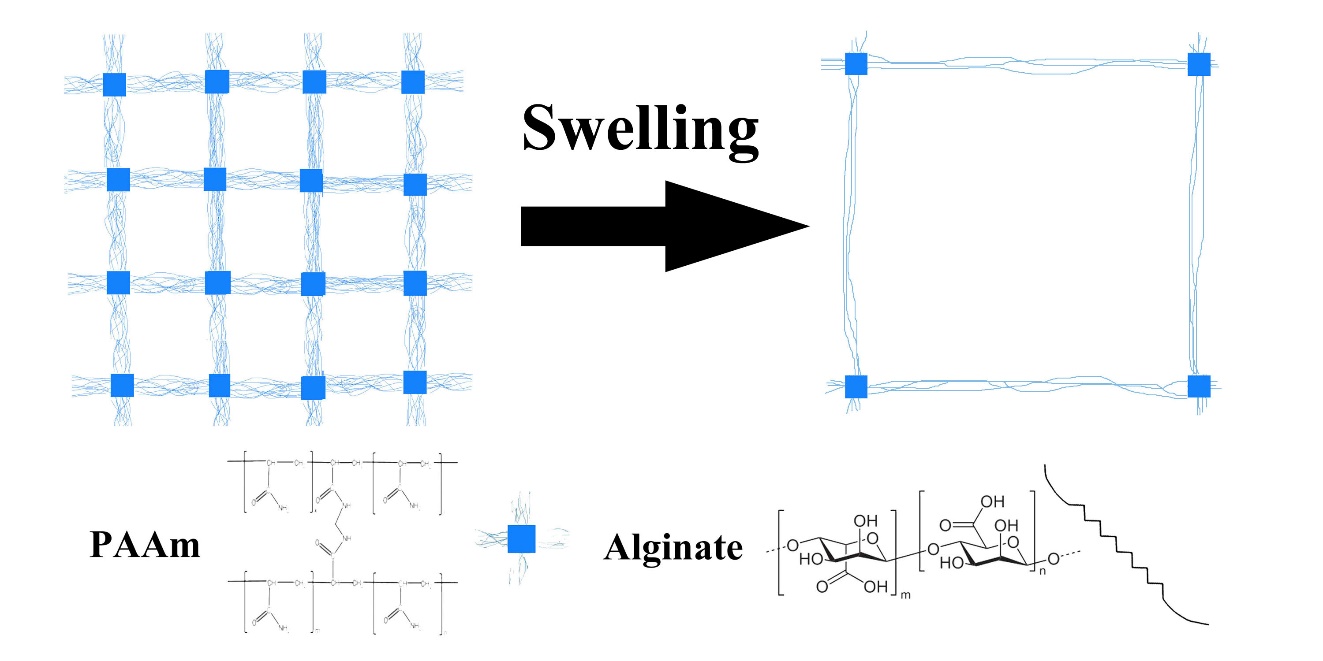


Figure S5. Schematic figure of SN gel in swelling state
